# Supplementary material for: Methane formation from the hydrogenation of carbon dioxide on Ni(110) surface – a density functional theoretical study
Source: Royal Society of Chemistry journal article supplement (doi:10.1039/c3cp44495c), 2013-01-01
Supplement: c3cp44495c.pdf [file c3cp44495c.pdf]

## Supporting Information

### Methane formation from the hydrogenation of Carbon dioxide on Ni (110) surface - A Density Functional Theoretical Study

Pallavi Bothra,<sup>1</sup> Ganga Periyasamy,<sup>2,3</sup> and Swapan K. Pati<sup>1,3#</sup>

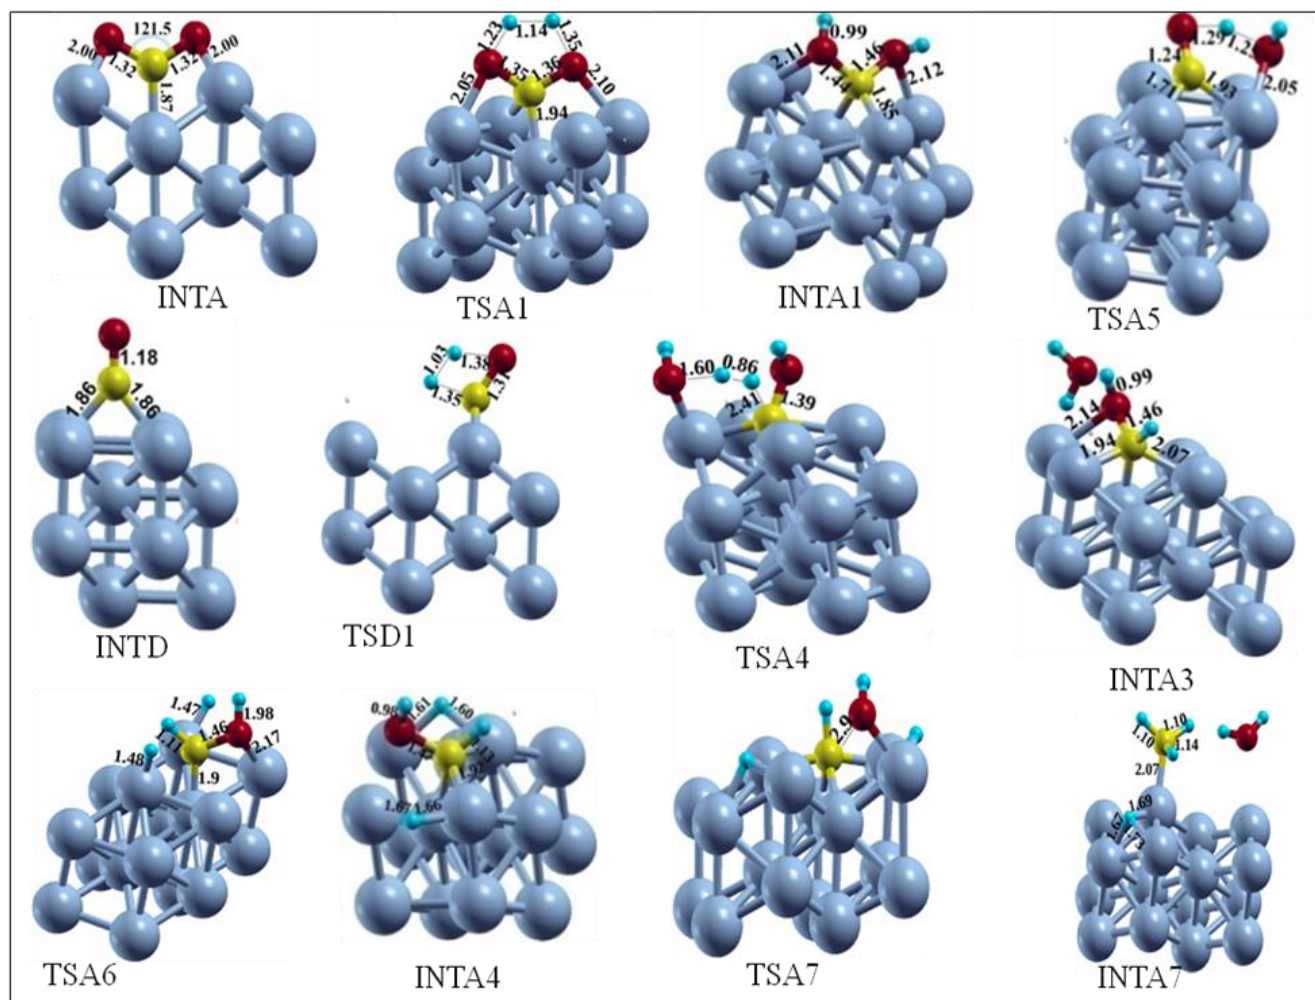

FigS1. Possible intermediates and transition states of Fig. 2

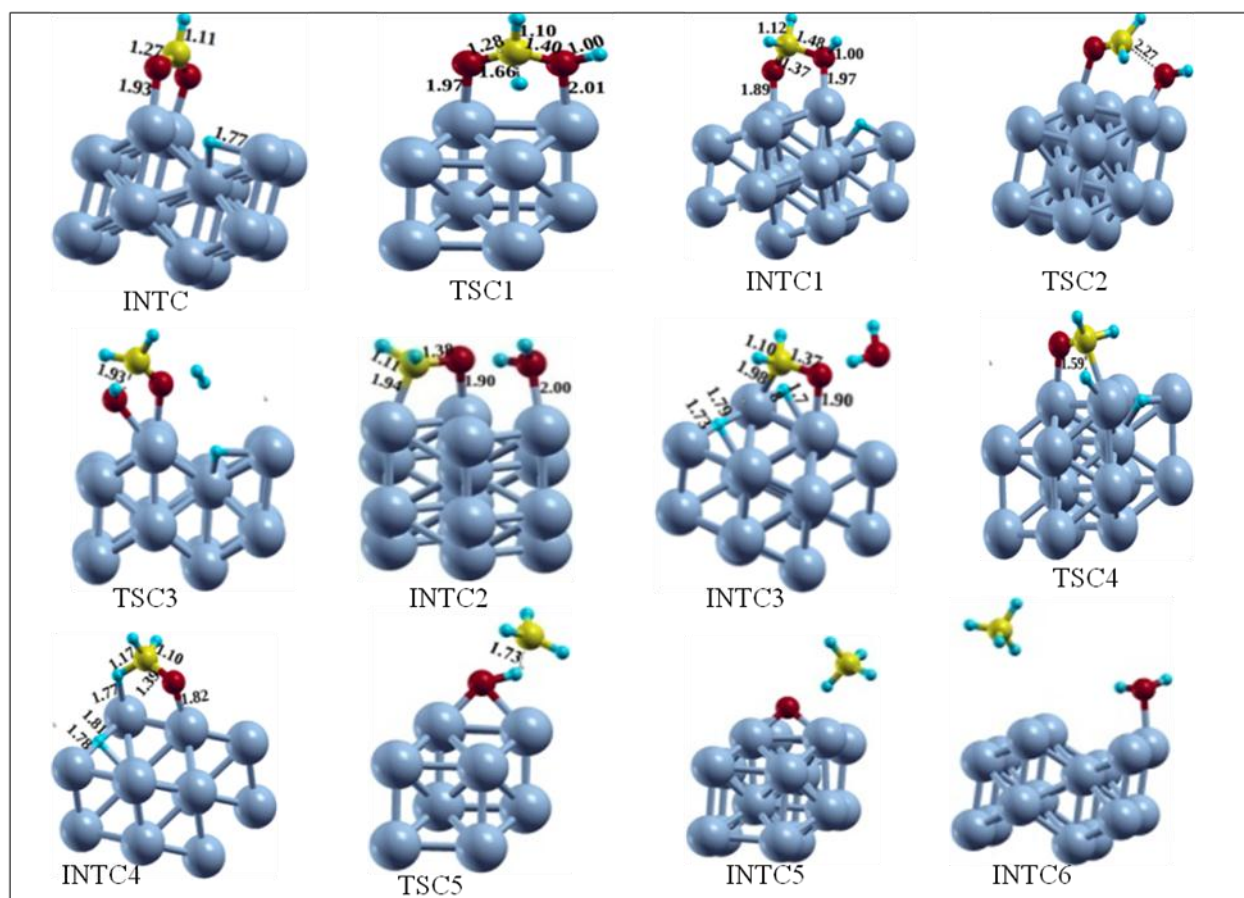

FigS2. Possible intermediates and transition states of Fig. 4

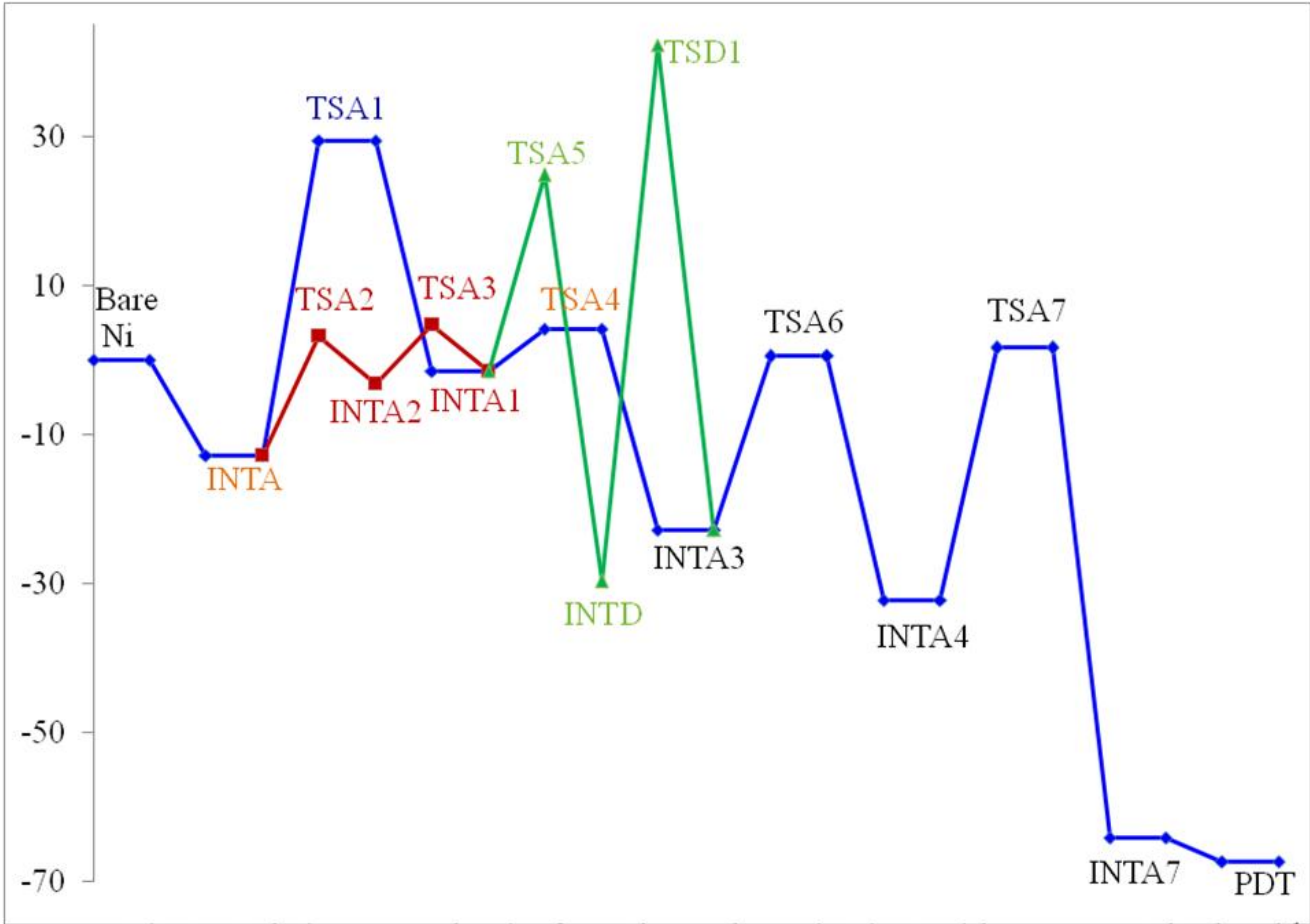

Fig S3. Relative energy barrier for pathway shown in Fig. 2 with respect to 0 kcal mol<sup>-1</sup>

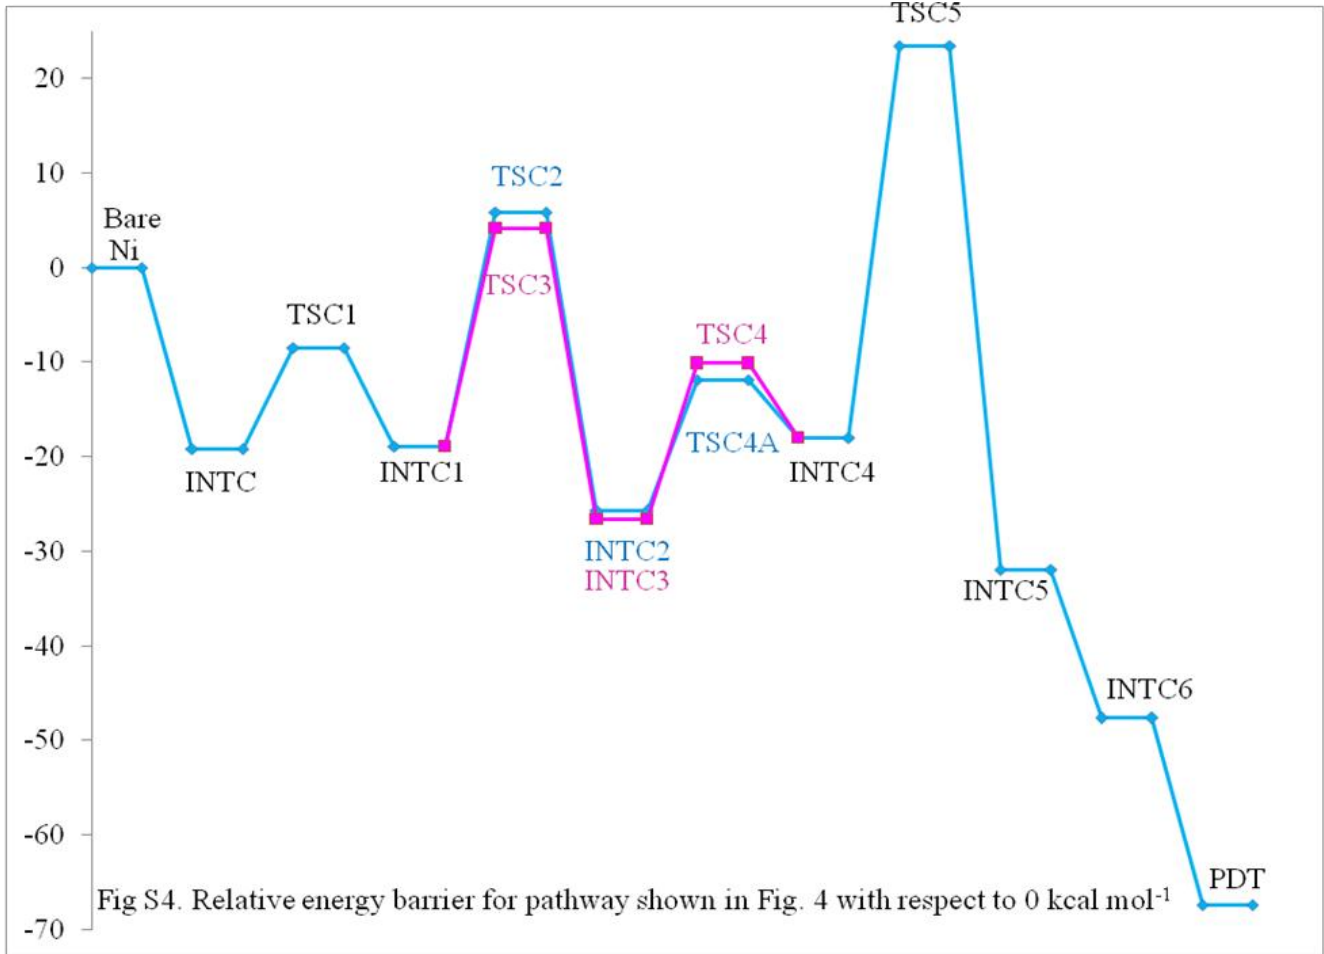

| Species | Binding<br>Energy(kcal<br>mol <sup>-1</sup> ) | Species | Binding<br>Energy(kcal mol <sup>-1</sup> ) |
|---------|-----------------------------------------------|---------|--------------------------------------------|
| Nickel  | 0.00                                          | INTB    | -9.12                                      |
| INTA    | -12.87                                        | INTC    | -19.21                                     |
| INTA1   | -1.51                                         | INTC1   | -18.93                                     |
| INTA3   | -22.83                                        | INTC2   | -26.58                                     |
| INTA4   | -32.26                                        | INTC3   | -25.74                                     |
| INTA7   | -64.18                                        | INTC4   | -18.02                                     |
| INTA2   | -3.22                                         | INTC5   | -31.97                                     |
| INTD    | -29.73                                        | INTC6   | -47.68                                     |
| PDT     | -67.39                                        |         |                                            |

TableS1: Binding Energies of different intermediates
